# Supplementary material
Source: PubMed Central journal article supplement (PMC2888412)
Supplement: supp_M110.113738_jbc.M110.113738-1.pdf [file supp_M110.113738_jbc.M110.113738-1.pdf]

Supplement Figure 1  
Carius et al.

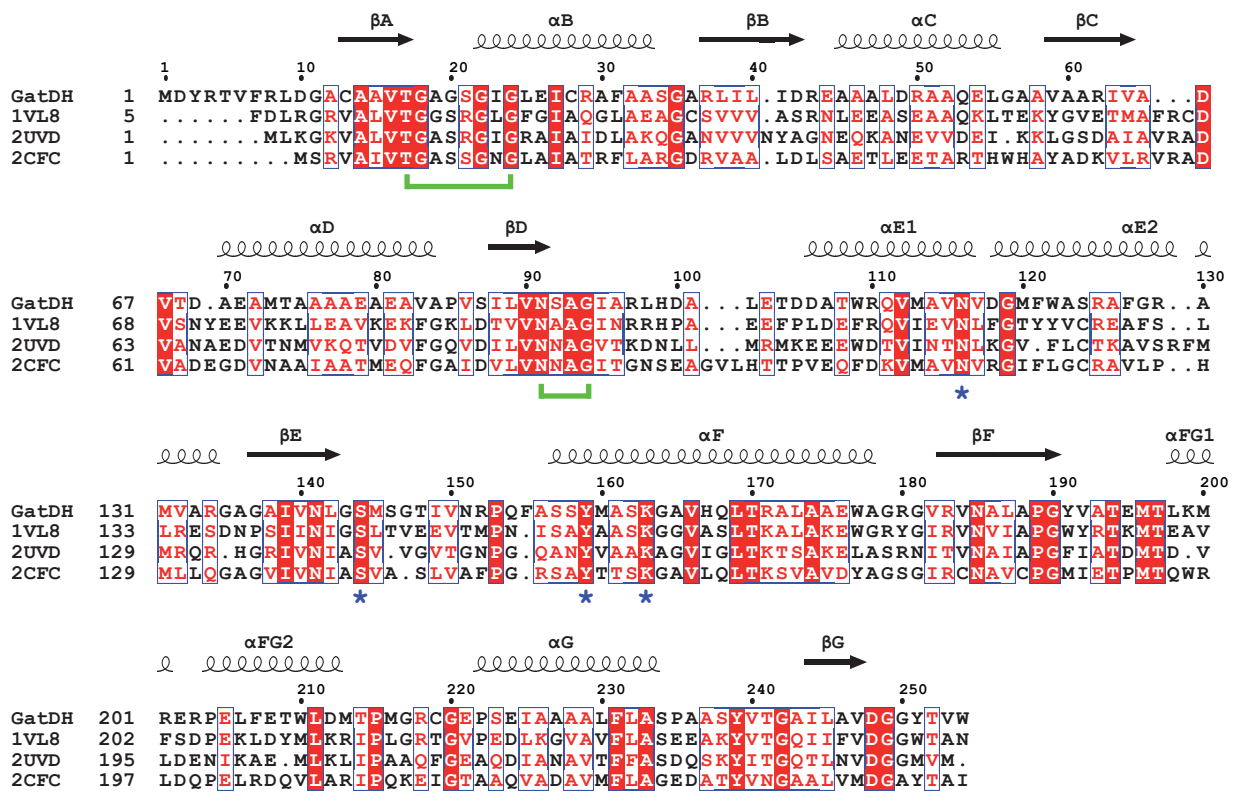

## Supplement Figure 1.

Structure-based sequence alignment of GatDH with the structurally closest SDR relatives as identified by the *DALI* server (1). The *DALI* server identified 2-(*R*)-hydroxypropyl-COM-dehydrogenase (PDB-entry 2CFC (2) from *Xantho-bacter autotrophicus* and 3-oxoacylreductase (PDB-entry 2UVD (3) from *Bacillus anthracis* as the closest structural homologues of GatDH. The structure of gluconate 5-dehydrogenase (PDB-entry 1VL8) from *Thermotoga maritima* was used as the template for homology modeling with *SwissModel* (4). The four conserved catalytic key residues and further GatDH positions discussed in the text are labeled by blue asterisks and the main binding motifs for the NAD(H) cofactor are underlined in green. The alignment was prepared with *SuperPose* (5) and *ESPrpt* (6). The secondary structure elements of GatDH as determined by *DSSP* (7) are shown above its sequence and are labeled according to (8).

## References

1. Holm, L., and Sander, C. (1996) *Science* **273**, 595-603
2. Krishnakumar, A. M., Nocek, B. P., Clark, D. D., Ensign, S. A., and Peters, J. W. (2006) *Biochemistry* **45**, 8831-8840
3. Zaccai, N. R., Carter, L. G., Berrow, N. S., Sainsbury, S., Nettleship, J. E., Walter, T. S., Harlos, K., Owens, R. J., Wilson, K. S., Stuart, D. I., and Esnouf, R. M. (2008) *Proteins* **70**, 562-567
4. Arnold, K., Bordoli, L., Kopp, J., and Schwede, T. (2006) *Bioinformatics* **22**, 195-201
5. Maiti, R., Van Domselaar, G. H., Zhang, H., and Wishart, D. S. (2004) *Nucleic Acids Res* **32**, W590-594
6. Gouet, P., Courcelle, E., Stuart, D. I., and Metz, F. (1999) *Bioinformatics* **15**, 305-308
7. Kabsch, W., and Sander, C. (1983) *Biopolymers* **22**, 2577-2637
8. Ghosh, D., Weeks, C. M., Grochulski, P., Duax, W. L., Erman, M., Rimsay, R. L., and Orr, J. C. (1991) *Proc Natl Acad Sci U S A* **88**, 10064-10068
