# Supplementary material
Source: PubMed Central journal article supplement (PMC2888412)
Supplement: supp_M110.113738_jbc.M110.113738-2.pdf [file supp_M110.113738_jbc.M110.113738-2.pdf]

Supplement Figure 2  
Carius et al.

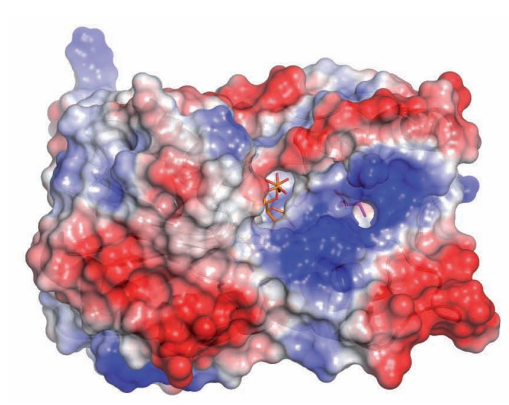

## Supplement Figure 2.

Surface representation of GatDH. Solvent-accessible surface colored according to the electrostatic potential of GatDH in the absence of cofactor and substrate. Positive and negative potentials are colored in blue and red, respectively. The bound cofactor NAD and substrate 1,2-(S)-pentanediol are shown as a stick models. The electrostatic potential was calculated with APBS (1) and displayed using PyMOL (2).

## References

1. Baker, N. A., Sept, D., Joseph, S., Holst, M. J., and McCammon, J. A. (2001) *Proc. Natl. Acad. Sci. U. S. A.* **98**, 10037-10041
2. Delano, W. L. (2004) [www.pymol.org](http://www.pymol.org)
