# Supplementary material
Source: PubMed Central journal article supplement (PMC2888412)
Supplement: supp_M110.113738_jbc.M110.113738-4.pdf [file supp_M110.113738_jbc.M110.113738-4.pdf]

**Supplement Table 1: Diffraction data collection and refinement statistics (complete list)****Data collection and processing**

|                                                              |                                                                                                                                                    |                                                                                                                                                           |                                                                                                           |
|--------------------------------------------------------------|----------------------------------------------------------------------------------------------------------------------------------------------------|-----------------------------------------------------------------------------------------------------------------------------------------------------------|-----------------------------------------------------------------------------------------------------------|
| Data set                                                     | GatDH                                                                                                                                              | GatDH with<br>1,2-pentanediol                                                                                                                             | GatDH with<br>erythritol                                                                                  |
| PDB entry                                                    | 2WSB                                                                                                                                               | 2WDZ                                                                                                                                                      | 2LQF                                                                                                      |
| Crystallization condition                                    | 100 mM sodium<br>cacodylate, pH 6.5<br>200 mM sodium<br>acetate<br>30 % PEG8000<br>4 % (v/v) n-<br>propanol<br>1 mM GatDH<br>1 mM NAD <sup>+</sup> | 100 mM MES, pH<br>5.5<br>200 mM MgCl <sub>2</sub><br>12.5 % MPEG5000<br>1 mM GatDH<br>8.3 mM NAD <sup>+</sup><br>50 mM 1,2-( <i>R,S</i> )-<br>pentanediol | 100 mM MES, pH<br>5.7<br>200 mM MgCl <sub>2</sub><br>14 % MPEG5000<br>1 mM GatDH<br>1 mM NAD <sup>+</sup> |
| X-Ray source                                                 | ID 14.3, ESRF                                                                                                                                      | BL 14.2, BESSY                                                                                                                                            | BL 14.2, BESSY                                                                                            |
| Detector                                                     | Mar165 CCD                                                                                                                                         | MARmosaic225                                                                                                                                              | MARmosaic225                                                                                              |
| Wavelength (Å)                                               | 0.93                                                                                                                                               | 0.92                                                                                                                                                      | 0.92                                                                                                      |
| Temperature (K)                                              | 100                                                                                                                                                | 100                                                                                                                                                       | 100                                                                                                       |
| Crystal-to-film distance (mm) <sup>a</sup>                   | 150/95/90 (lr/mr/hr)                                                                                                                               | 290/180 (lr/hr)                                                                                                                                           | 200                                                                                                       |
| Exposure time (sec) <sup>a</sup>                             | 3/6/50 (lr/mr/hr)                                                                                                                                  | 3.5/7.2 (lr/hr)                                                                                                                                           | 3.5                                                                                                       |
| Oscillation range (deg.)                                     | 0.4                                                                                                                                                | 1                                                                                                                                                         | 0.5                                                                                                       |
| total oscillation range (deg.) <sup>a</sup>                  | 100/100/52.7<br>(lr/mr/hr)                                                                                                                         | 180                                                                                                                                                       | 180                                                                                                       |
| Space group                                                  | P2(1)2(1)2(1)                                                                                                                                      | C222(1)                                                                                                                                                   | P2(1)2(1)2(1)                                                                                             |
| Cell dimensions (Å, deg.)                                    |                                                                                                                                                    |                                                                                                                                                           |                                                                                                           |
| a / b / c                                                    | 97.8/106.6/109.3                                                                                                                                   | 60.8 / 113.6 / 257.3                                                                                                                                      | 63.8 / 113.8 / 123.2                                                                                      |
| α / β / γ                                                    | 90/90/90                                                                                                                                           | 90 / 90 / 90                                                                                                                                              | 90 / 90 / 90                                                                                              |
| Resolution limit (Å) <sup>b</sup>                            | 20-1.25 (1.28-1.25)                                                                                                                                | 20-1.95 (2.06-1.95)                                                                                                                                       | 33.3 – 1.8 (1.85-1.8)                                                                                     |
| Completeness (%) <sup>b</sup>                                | 99.9 (99.8)                                                                                                                                        | 98.5 (98.5)                                                                                                                                               | 99.9 (99.3)                                                                                               |
| No. observations (overall /<br>unique)                       | 2111884/313320                                                                                                                                     | 572842 / 64019                                                                                                                                            | 614280 / 83822                                                                                            |
| Average redundancy                                           | 6.7 (2.5)                                                                                                                                          | 8.9 (4.8)                                                                                                                                                 | 7.3 (6.8)                                                                                                 |
| $\langle I/\sigma(I) \rangle$ <sup>b</sup>                   | 8.4 (2.0)                                                                                                                                          | 15.1 (1.8)                                                                                                                                                | 17.65 (2.9)                                                                                               |
| $R_{p.i.m.}$ <sup>b,c</sup>                                  | 3.7 (34.8)                                                                                                                                         | 4.0 (31.6)                                                                                                                                                | 8.4 (74.7)                                                                                                |
| <i>B</i> -factor from Wilson plot (Å <sup>2</sup> )          | 10.5                                                                                                                                               | 32                                                                                                                                                        | 28.5                                                                                                      |
| <b>Refinement statistics</b>                                 |                                                                                                                                                    |                                                                                                                                                           |                                                                                                           |
| Resolution limit (Å)                                         | 20-1.25                                                                                                                                            | 20-1.95                                                                                                                                                   | 30 – 1.8                                                                                                  |
| Number of unique reflections <sup>b</sup>                    | 297654                                                                                                                                             | 60703                                                                                                                                                     | 83814                                                                                                     |
| $R_{cryst}$ (%) <sup>b,d</sup>                               | 13.4 (28.4)                                                                                                                                        | 18.9 (26.8)                                                                                                                                               | 17.9 (26.1)                                                                                               |
| $R_{free}$ (%) <sup>b,e</sup>                                | 17.7 (31.2)                                                                                                                                        | 24.0 (33.2)                                                                                                                                               | 22.2 (30.3)                                                                                               |
| No. of non-H atoms                                           |                                                                                                                                                    |                                                                                                                                                           |                                                                                                           |
| Protein                                                      | 8177                                                                                                                                               | 7631                                                                                                                                                      | 7828                                                                                                      |
| Solvent                                                      | 1765                                                                                                                                               | 495                                                                                                                                                       | 509                                                                                                       |
| Ramachandran plot (%)                                        |                                                                                                                                                    |                                                                                                                                                           |                                                                                                           |
| Favoured / allowed /<br>generous <sup>f</sup>                | 98.8 / 1.2 / 0                                                                                                                                     | 98.1 / 1.8 / 0.1                                                                                                                                          | 98.1 / 1.7 / 0.2                                                                                          |
| Coordinate error <sup>g</sup>                                | 0.04                                                                                                                                               | 0.07                                                                                                                                                      | 0.05                                                                                                      |
| Rms deviations from ideal<br>values                          |                                                                                                                                                    |                                                                                                                                                           |                                                                                                           |
| Bond lengths (Å)                                             | 0.03                                                                                                                                               | 0.02                                                                                                                                                      | 0.014                                                                                                     |
| Bond angles (deg.)                                           | 2.4                                                                                                                                                | 1.86                                                                                                                                                      | 1.403                                                                                                     |
| Mean <i>B</i> -factor (Å <sup>2</sup> ) per protein<br>chain |                                                                                                                                                    |                                                                                                                                                           |                                                                                                           |
| Backbone                                                     | 15.6 / 15.9 / 15.7 /<br>16.9                                                                                                                       | 23.0 / 23.7 / 29.1 /<br>26.4                                                                                                                              | 22.9 / 20.5 / 22.8 /<br>24.6                                                                              |

|            |                              |                              |                              |
|------------|------------------------------|------------------------------|------------------------------|
| Side chain | 18.6 / 19.9 / 18.9<br>/21.0  | 25.8 / 26.6 / 31.5 /<br>29.1 | 25.9 / 23.2 / 25.2 /<br>26.7 |
| Solvent    | 38.7 / 38.7 / 38.0 /<br>39.1 | 31.2 / 31.2 / 33.7 /<br>32.2 | 31.3 / 29.2 / 30.6 /<br>31.1 |

<sup>a</sup> lr, low-resolution data set; mr, medium-resolution data set; hr, high-resolution data set

<sup>b</sup> Values in parentheses are for the high-resolution bin.

$$R_{p.i.m} = 100 \times \sum_{hkl} \sqrt{\frac{1}{N-1}} \sum_i |I_i(hkl) - \langle I_i(hkl) \rangle| / \sum_{hkl} \sum_i I_i(hkl)$$

where  $I_i(hkl)$  is the intensity of the  $i$ th individual measurement of the reflection with Miller indices  $hkl$  and  $\langle I_i(hkl) \rangle$  is the mean intensity of all measurements of  $I(hkl)$ , calculated for  $I \geq 3\sigma(I)$ ;  $N$  is the redundancy or multiplicity of the observed reflection (1,2).

$$R_{cryst} = 100 \times \sum \left( \|F_{obs} - k|F_{calc}|\| \right) / \sum |F_{obs}|$$

where  $F_{obs}$  and  $F_{calc}$  are the observed and calculated structure factor amplitudes, respectively.

<sup>e</sup>  $R_{free}$  is equivalent to  $R_{cryst}$  but calculated with reflections (5 %) omitted from the refinement process (3,4).

<sup>f</sup> Calculated using the program *PROCHECK* (5).

<sup>g</sup> Calculated based on a Luzzati plot using the program *SFCHECK* (6).

## REFERENCES

1. Weiss, M. (2001) *J. Appl. Cryst.* **34**, 130-135
2. Diederichs, K., and Karplus, P. A. (1997) *Nat Struct Biol* **4**, 269-275
3. Brunger, A. T. (1992) *Nature* **355**, 472-475
4. Tickle, I. J., Laskowski, R. A., and Moss, D. S. (2000) *Acta Cryst.* **D56**, 442-450
5. Laskowski, R. A., MacArthur, M. W., Moss, D. S., and Thornton, J. M. (1993) *J. Appl. Cryst.* **26**, 283-291
6. Vaguine, A. A., Richelle, J., and Wodak, S. J. (1999) *Acta Cryst.* **D55**, 191-205
